# Supplementary material for: Prone Position in Mechanically Ventilated COVID-19 Patients: A Multicenter Study
Source: MDPI journal article supplement (doi:10.3390/jcm10051046), 2021-03-03

**Supplementary Figure S1.** Study flowchart prone position (PP) in coronavirus disease 2019 (COVID-19) patients. ICU, intensive care unit; ARDS, acute respiratory distress syndrome.

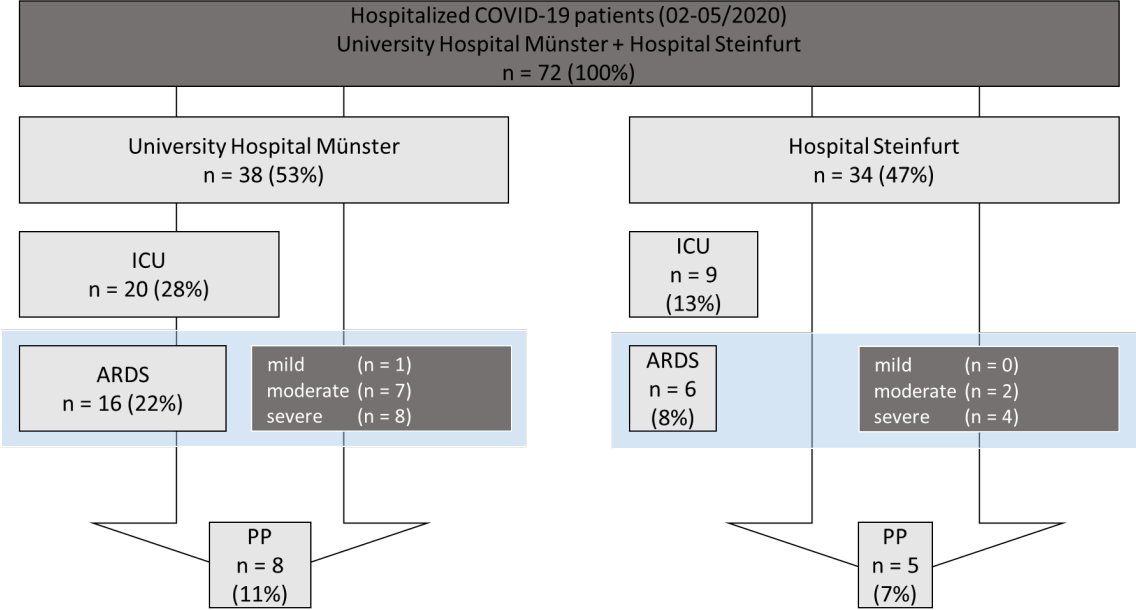

Supplement: s1 [file s1]
